# Supplementary material for: Enhanced performance in low band gap polymer solar cells via surface lattice resonance of non-noble metals
Source: Royal Society of Chemistry journal article supplement (doi:10.1039/d6ra01628f), 2026-04-17
Supplement: d6ra01628f1.pdf [file d6ra01628f1.pdf]

## Electronic Supporting Information

### Enhanced Performance in Low Band Gap Polymer Solar Cells via Lattice Surface Resonance of Non-Noble Metals

Simenew A. Mulat<sup>1,2</sup>, Fekadu G. Hone<sup>1</sup>, Nika Bekri<sup>\*3,4,5</sup>, Newayemedhin A. Tegegne<sup>\*,1</sup>

<sup>1</sup>Department of Physics, Addis Ababa University, 1176 Addis Ababa, Ethiopia. <sup>2</sup>Department of Physics, Hawassa University, 05 Hawassa, Ethiopia <sup>3</sup>Sustainable Energy Center of Excellence, Addis Ababa Science and Technology University, 16417, Addis Ababa, Ethiopia <sup>4</sup>Nuclear Reactor Technology Center of Excellence, Addis Ababa Science and Technology University, 16417, Addis Ababa, Ethiopia <sup>5</sup>Department of Mathematics, Physics and Statistics, Addis Ababa Science and Technology University, 16417, Addis Ababa, Ethiopia.

Corresponding authors\* nika.bekri@aastu.edu.et and newaye.medhin@aau.edu.et

#### S1 Simulation materials

In order to model the simulation materials, the optical constants of ITO, TiO<sub>2</sub>, PTB7:PC<sub>71</sub>BM, MoO<sub>3</sub>, and metal electrode (Ag) were implemented in FDTD using the multi-coefficient model (MCM), which is a generalized dispersive material model. This model provides much better fits to experimental data than conventional models like Drude and/or Lorentz. The MCM employs a rational function with multiple optimized poles, enabling extremely accurate broadband fitting of experimental n and k data while maintaining causality and numerical stability. This approach is particularly suitable for organic semiconductors and metal oxides with complex dispersion, ensuring reliable optical simulations across the entire solar spectrum.

#### S2 Power conversion Efficiency Calculation

The PCE of the devices was calculated as follows. The open circuit ( $V_{oc}$ ) was calculated using Equation 1.

$$V_{oc} = \frac{1}{q} \left| E_{HOMO}^{Donor} - E_{LUMO}^{Acceptor} \right| - 0.3 \text{ V} \quad (1)$$

Here, the HOMO of PTB7 and LUMO of PC<sub>71</sub>BM energy levels are -5.15 eV and -3.9 eV to 4.0 eV, the potential energy difference at the donor/acceptor interface is 0.85 V.

The fill factor (FF) of the simulated devices is calculated using Equation 2, and the calculated to be 0.70%.

$$FF = \frac{(V_{oc} - \ln(V_{oc} + 0.72))}{(V_{oc} + 1)} \quad (2)$$

The short-circuit current density ( $J_{sc}$ ) is calculated using Equation 3.

$$J_{sc} = q \int_{300 \text{ nm}}^{1000 \text{ nm}} A(\lambda) \frac{\lambda}{hc} AM1.5G(\lambda) d\lambda \quad (3)$$

Where AM1.5G is the solar irradiance spectrum,  $A(\lambda)$  is optical absorption in the AL of the devices and determined from the time-averaged optical absorption power in the absorber layer as estimated in Equation ?? using FDTD simulation.

$$P_{abs} = \frac{1}{2} \varepsilon_0 \omega \int \text{Im}(\varepsilon) |\mathbf{E}|^2 dV \quad (4)$$

Where  $\varepsilon''$  is the imaginary part of permittivity for the absorber layer electric field amplitude  $E$  is the electric field in the AL,  $\omega$  is the angular frequency of the incident light, and  $V$  is the volume of the AL materials.

Finally, the PCE was calculated using Equation 5

$$PCE = \frac{J_{sc} V_{oc} FF}{P_{in}}, \quad (5)$$

### S3 Supplementary Figures and Tables

Put all table belwo

### S4 References

### References

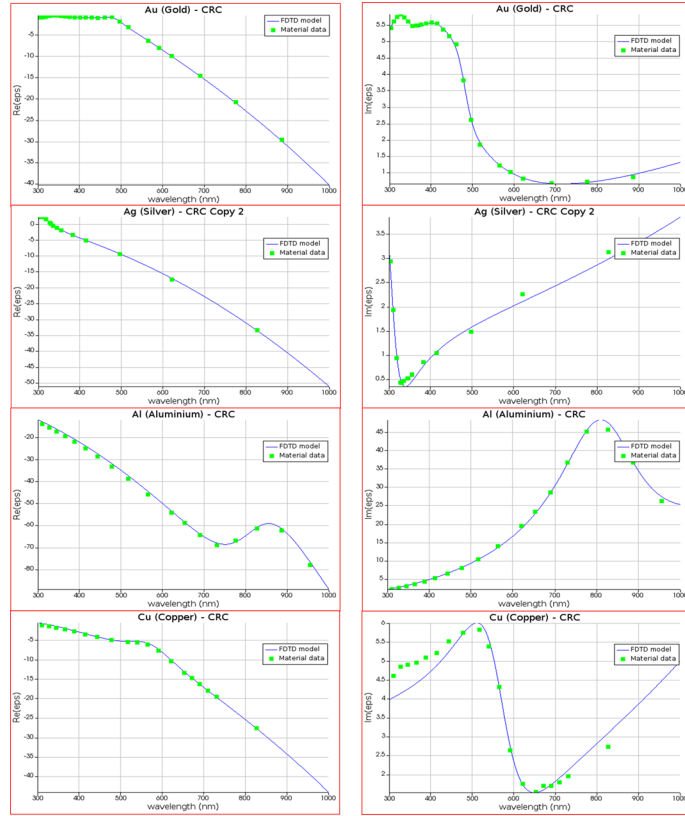

Figure S1: Material dispersion of plasmonic particles (Ag, Al, Au and Cu) fitted using the multi-coefficient model (MCM) in FDTD. The MCM provides accurate broadband reproduction of the experimental refractive index ( $n$ ) and extinction coefficient ( $k$ ) data.

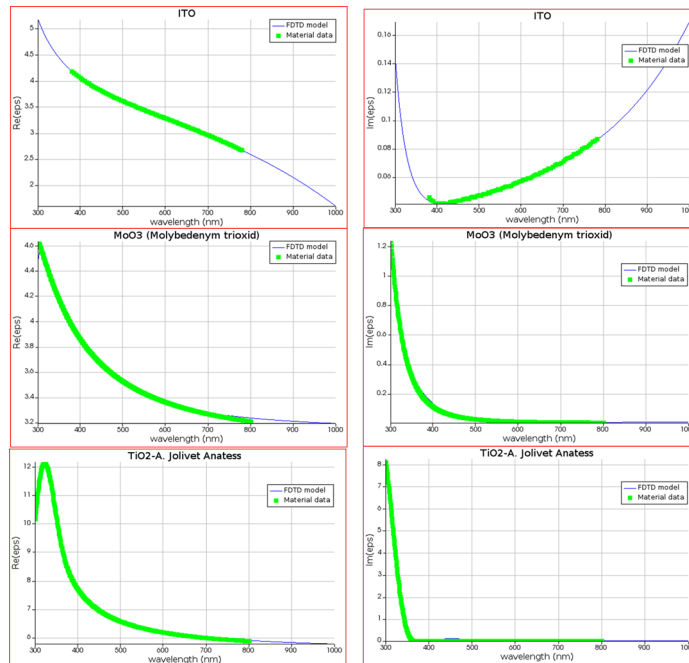

Figure S2: The fitted curves are given by the multi-coefficient model (MCM) in FDTD of ITO,  $\text{MoO}_3$ ,  $\text{TiO}_2$  over the solar spectrum range from 300 nm to 1000 nm.

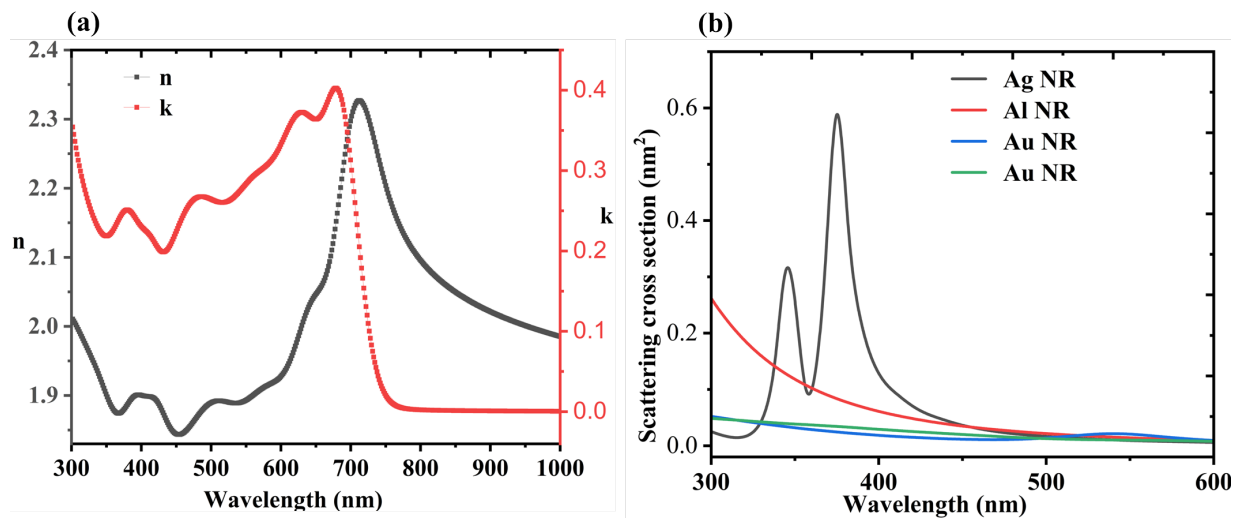

Figure S3: a) real (n) and imaginary (k) refractive indices of the PTB7:PC<sub>71</sub>BM. b) the scattering cross section of PNRs under simulated air (n=1)

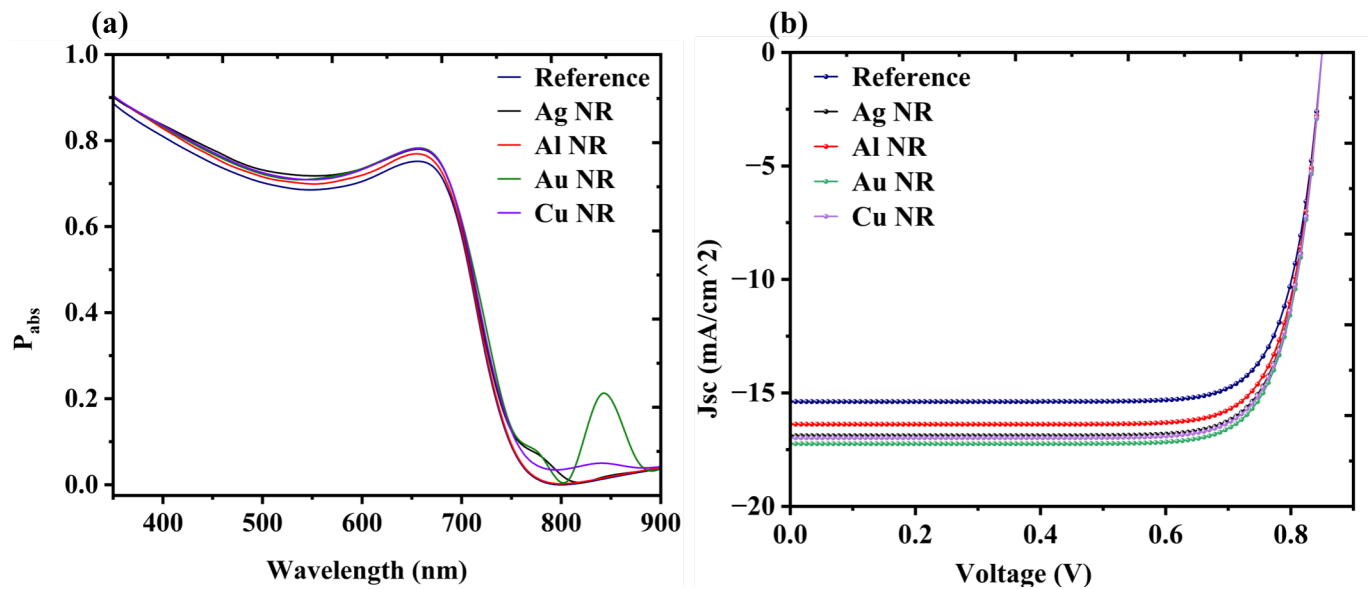

Figure S4: a) The absorption power of PTB7:PC<sub>71</sub>BM incorporated with Ag, Al, Au, and Cu NRs and b) The J-V curve for four Plasmonic NRs at an optimized AR (1.88)

Table S1: Electrical and optical parameters of active layer, electron transport layers, and hole transport layer of the OSC devices.

| <b>Parameters</b>                           | <b>PTB7:PC71BM</b>   | <b>TiO<sub>2</sub></b> | <b>MoO<sub>3</sub></b> |
|---------------------------------------------|----------------------|------------------------|------------------------|
| Ionization energy (IE)                      | 5.05                 | 5.85                   | –                      |
| Donor/Acceptor density                      | 0                    | 0                      | 0                      |
| Electron affinity (AI)                      | 3.7                  | 3.9                    | 3                      |
| Optical band gap ( $E_{\text{opt}}$ )       | 1.8                  | 1.8                    | 3                      |
| Transition band gap ( $E_t$ )               | 2.25                 | 1.90                   | –                      |
| Exciton binding energy ( $E_{\text{exc}}$ ) | 0.62                 | 0.62                   | –                      |
| Hole mobility (cm <sup>2</sup> /Vs)         | $5.8 \times 10^{-4}$ | 1.3                    | 2.3                    |
| Electron mobility (cm <sup>2</sup> /Vs)     | $5 \times 10^{-4}$   | 1.3                    | –                      |
| Absorbance range (nm)                       | 300–750              | 300–500                | –                      |
| Relative permittivity                       | 3.9                  | 9                      | 12.5                   |
| Energy level (eV)                           | 1.1                  | –                      | –                      |
| Thickness (nm)                              | 100                  | –                      | 20                     |
| Defect density (cm <sup>-3</sup> )          | $10^{12}$            | $1 \times 10^{14}$     | –                      |
